# Supplementary material for: Fisheries portfolio diversification and turnover buffer Alaskan fishing communities from abrupt resource and market changes
Source: PubMed Central journal article supplement (PMC5241831; doi:10.1038/ncomms14042), 2017-01-16
Supplement: ncomms14042-s1.pdf [file ncomms14042-s1.pdf]

1 **Supplementary Material**

2 **Supplementary Table 1: Model Selection for dynamic factor analysis models evaluating**  
3 **common patterns in time series of commercial fisheries catches in 60 stocks around Alaska**

4 Stocks are delineated by species or species group and area harvested. We tested up to two trend  
5 models. We considered two error structures; where all stocks share a single observation error  
6 (DE), where all stocks have individual observation error (DUE). A one-trend model indicates the  
7 most commonly shared trend among the 60 time series of commercial fisheries catches.

| Number of trends | Error structure | Num. parameters | AIC         | $\Delta$ AIC |
|------------------|-----------------|-----------------|-------------|--------------|
| <b>1</b>         | <b>DE</b>       | <b>61</b>       | <b>5643</b> | <b>0</b>     |
| 1                | DUE             | 120             | 5732        | 89           |
| 2                | DE              | 120             | 5678        | 35           |
| 2                | DUE             | 179             | 5720        | 77           |

8

9

10 **Supplementary Table 2: Model Selection for dynamic factor analysis models evaluating**  
 11 **common patterns in time series of commercial fisheries revenue from 105 Alaskan**  
 12 **communities** We tested up to two trend models. We considered two error structures; where all  
 13 stocks share a single observation error (DE), where all stocks have individual observation error  
 14 (DUE). A two-trend model indicates the two most commonly shared trends among the 105 time  
 15 series of commercial fisheries revenue.

| Number of trends | Error structure | Num. parameters | AIC         | $\Delta$ AIC |
|------------------|-----------------|-----------------|-------------|--------------|
| 1                | DE              | 106             | 6972        | 1316         |
| 1                | DUE             | 210             | 6361        | 884          |
| 2                | DE              | 210             | 6257        | 599          |
| <b>2</b>         | <b>DUE</b>      | <b>314</b>      | <b>5658</b> | <b>0</b>     |

16

17

18 **Supplementary Table 3: Regression results explaining changes in community revenues**  
 19 **against changes in catch and changes in price** Changes in revenue are measured as the percent  
 20 change in revenue from commercial fishing for each community from before (1980-1989) and  
 21 after (1990-1999) the regime shifts. Changes in catch are measured as the percent change in  
 22 catch (pounds harvested) from commercial fishing for these same years. Percent changes in price  
 23 are computed from prices weighted by the proportion of commercial harvest by weight. To  
 24 assess relative strength of covariates, effect sizes were computed using a separate regression of  
 25 z-score standardized variables. Best model includes full main effects and interaction terms. The  
 26 full model explains 93% of the variation in in change in revenue ( $R^2=0.9268$ ,  $p < 0.001$ ).  
 27

| Covariate                                                     | Coefficient | Std. Error | P-value | Effect Size |
|---------------------------------------------------------------|-------------|------------|---------|-------------|
| Intercept                                                     | -6.790      | 2.295      | <0.0001 |             |
| Change in catch                                               | 0.913       | 0.040      | <0.0001 | 1.19        |
| Change in price                                               | 0.801       | 0.060      | <0.0001 | 0.84        |
| Interaction between<br>change in catch and<br>change in price | 0.008       | 0.001      | <0.0001 | 0.43        |

28  
 29  
 30

31 **Supplementary Table 4: Model selection for regression analysis of changes in revenue in**  
 32 **response to different types of diversification** We tested richness (the number of fisheries) and  
 33 diversity (a combination of richness and evenness as measured by the Reciprocal Simpson's  
 34 Index). Both variables are  $\log_{10}$  transformed. To assess relative strength of covariates, effect  
 35 sizes were computed using a separate regression of z-score standardized variables.

| Model Covariates               | Number of parameters | AIC          | $\Delta$ AIC | Effect Size |
|--------------------------------|----------------------|--------------|--------------|-------------|
| Number of fisheries (richness) | 2                    | 735.9        | 6.0          | 9.9         |
| <b>Diversity</b>               | <b>2</b>             | <b>729.9</b> | <b>0</b>     | <b>13.7</b> |

36

37 **Supplementary Table 5: Regression model selection for changes in revenue as a function of**  
 38 **diversification and turnover** Changes in revenue are measured as the percent change in revenue  
 39 from commercial fishing for each community from before (1980-1989) and after (1990-1999) the  
 40 regime shifts. Diversification is measured as Reciprocal Simpson's Diversity ( $\log_{10}$ ) and  
 41 turnover is measured using Jaccard's Dissimilarity index ( $\log_{10}$ ).

| Model covariates                                         | Number of parameters | AIC           | $\Delta$ AIC |
|----------------------------------------------------------|----------------------|---------------|--------------|
| Diversification                                          | 2                    | 1001.7        | 5.66         |
| Turnover                                                 | 2                    | 1001.6        | 5.65         |
| Diversification + Turnover                               | 3                    | 999.58        | 3.54         |
| Diversification + Diversification*Turnover               | <b>3</b>             | <b>996.04</b> | <b>0</b>     |
| Diversification + Turnover +<br>Diversification*Turnover | 4                    | 997.66        | 1.62         |

42

43

44 **Supplementary Table 6: Regression parameters for the best linear model fit for changes in**  
 45 **community commercial fishing revenues as a function of diversification and turnover**

46 Changes in revenue are measured as the percent change in revenue from commercial fishing for  
 47 each community from before (1980-1989) and after (1990-1999) the regime shifts.

48 Diversification is measured as Reciprocal Simpson’s Diversity ( $\log_{10}$ ) and turnover is measured  
 49 using Jaccard’s Dissimilarity index ( $\log_{10}$ ). To assess relative strength of covariates, effect sizes  
 50 were computed using a separate regression of z-score standardized variables. The best model  
 51 includes main effects on diversification and interaction terms. The full model explains 26% of  
 52 the variation in in change in revenue ( $R^2=0.26$ ,  $p < 0.00001$ ).

53

| Covariate                | Coefficient | Std. error | P-value | Effect size |
|--------------------------|-------------|------------|---------|-------------|
| Intercept                | -41.43      | 3.965      | <0.0001 |             |
| Diversification          | 123.5       | 21.78      | <0.0001 | 0.307       |
| Diversification*Turnover | 71.52       | 25.81      | <0.01   | 0.187       |

54

55

56

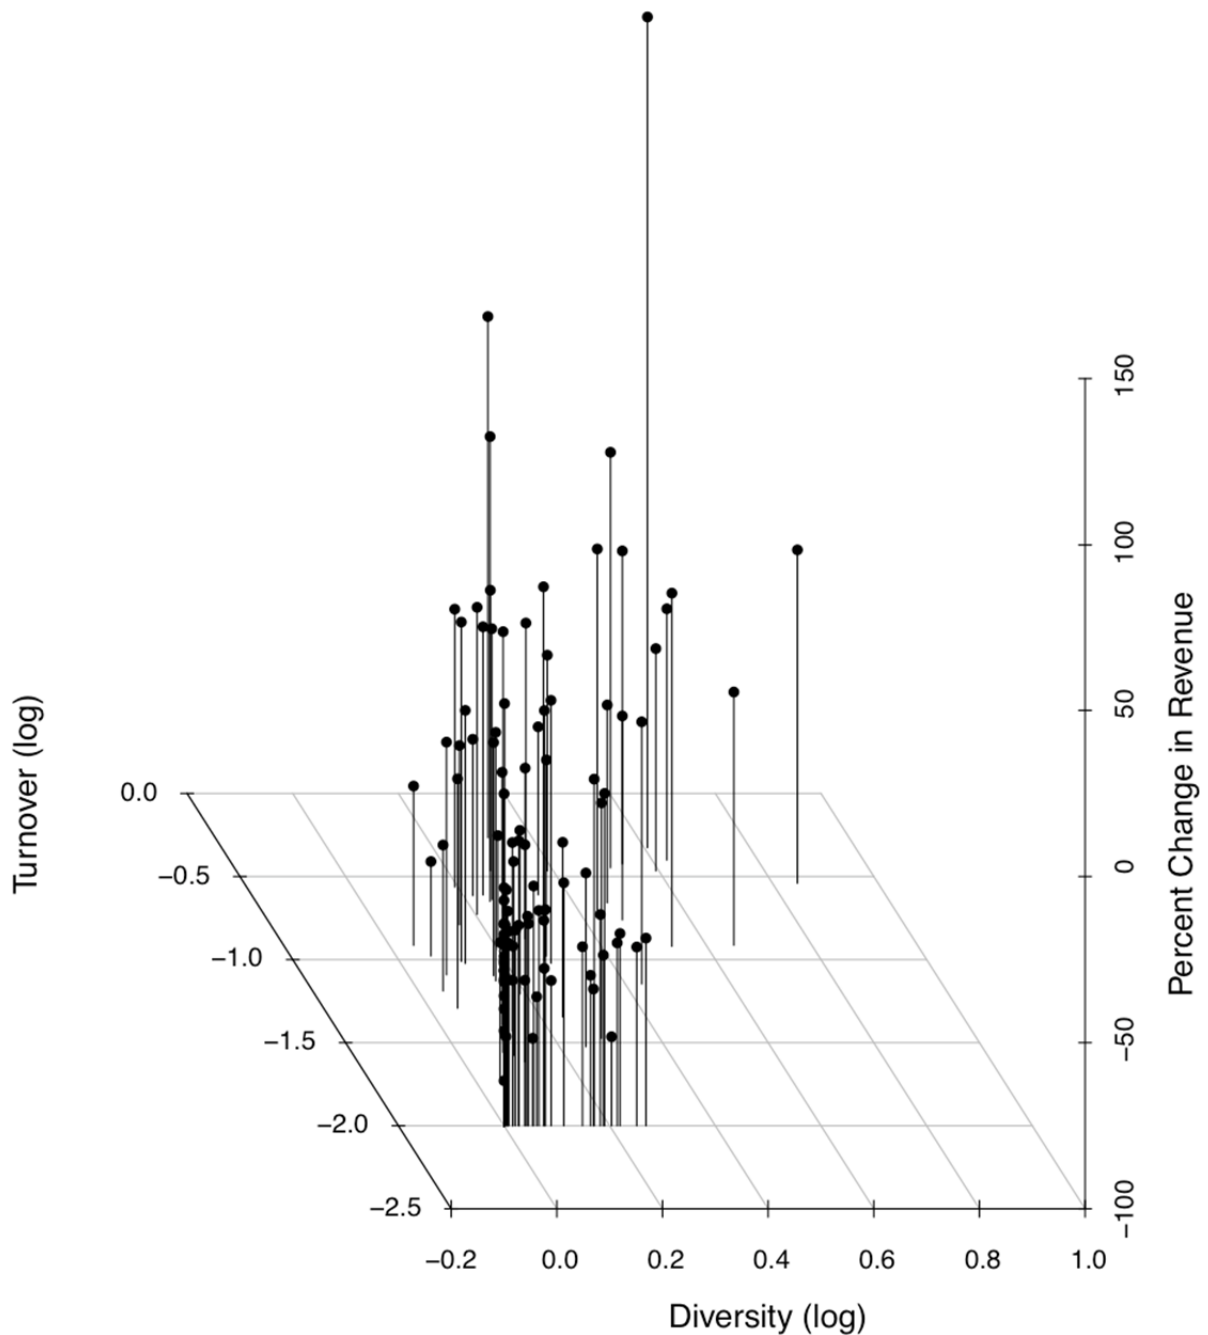

57

58 **Supplementary Figure 1: Diversification and turnover of fishing opportunities buffer**

59 **against abrupt shifts** Observed changes in revenues from before (1980-1989) and after (1990-

60 1999) are plotted against diversity and turnover of fishing opportunities for 105 Alaskan fishing

61 communities. Diversity, as measured by the reciprocal of Simpson diversity (log scale), indicates

62 total portfolio size and distribution among component stocks (often referred to as alpha

63 diversity). Turnover (often referred to as beta diversity) is Jaccard's dissimilarity index  
64 measuring changes in the in the relative contribution of stocks to a communities overall portfolio  
65 (by catch). Regression analysis indicates the best linear model between changes in revenue as  
66 explained by Simpson's diversity and turnover includes a significant interaction ( $R^2=0.26$ ,  
67  $p<0.0001$ , Supplementary Table 5, Supplementary Table 6).  
68
